# Supplementary material for: Data worth analysis within a model-free data assimilation framework for soil moisture flow
Source: Copernicus journal article supplement (doi:10.5194/hess-27-2661-2023), 2023-07-19
Supplement: Supplementary file 1 [file hess-27-2661-2023-supplement.pdf]

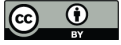

*Supplement of*

## **Data worth analysis within a model-free data assimilation framework for soil moisture flow**

**Yakun Wang et al.**

*Correspondence to:* Liangsheng Shi ([liangshs@whu.edu.cn](mailto:liangshs@whu.edu.cn))

The copyright of individual parts of the supplement might differ from the article licence.

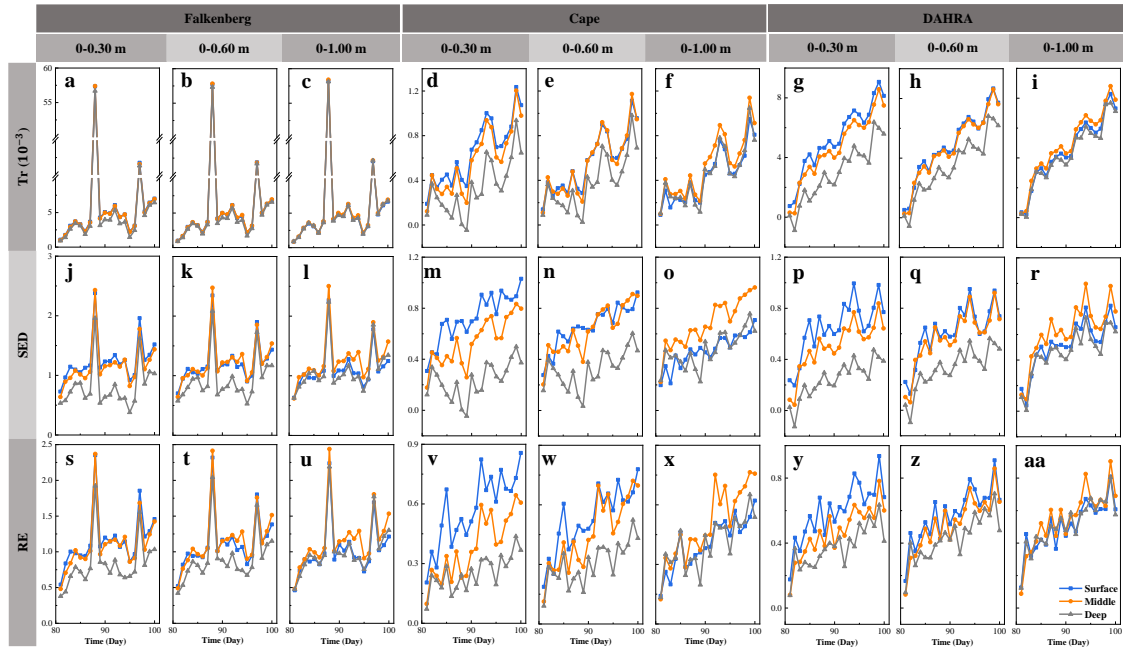

**Figure S1.** The expected data-worth of potential soil moisture observations in the surface, middle, and deep layers in the form of trace ( $T_r$ ), Shannon entropy difference ( $SED$ ), and relative entropy difference ( $RE$ ), respectively, regarding the retrieval of average soil moisture in the top 0.30 m, 0.60 m, and 1.00 m at three sites, when EnKF is replaced by particle filtering (PF) in the proposed NP-DWA framework

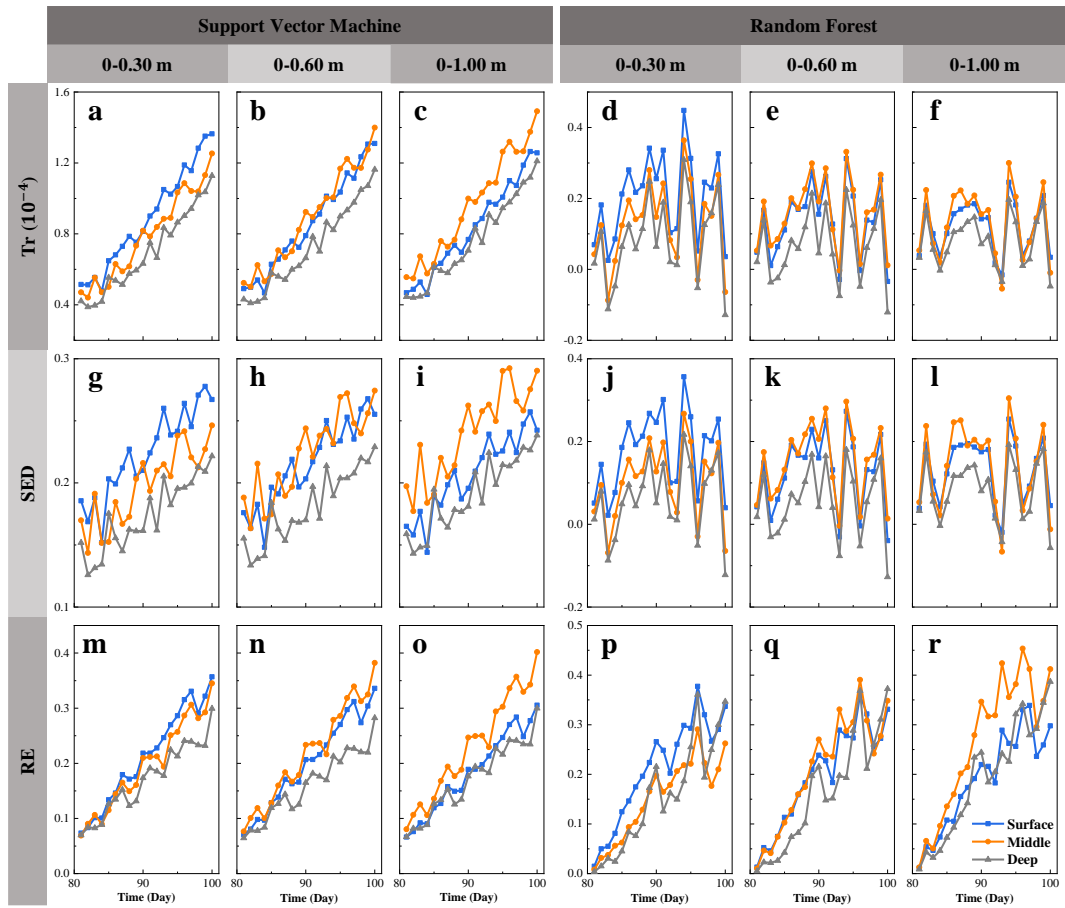

**Figure S2.** The expected data-worth of potential soil moisture observations in the surface, middle, and deep layers in the form of  $T_r$ ,  $SED$ , and  $RE$  regarding the retrieval of average soil moisture in the top 0.30 m, 0.60 m, and 1.00 m at DAHRA site, when GP is replaced by support vector machine (SVM) and random forest (RF) in the proposed NP-DWA framework, respectively
